# Supplementary material for: Silencing of Glycogen Synthase Kinase 3 Significantly Inhibits Chitin and Fatty Acid Metabolism in Asian Citrus Psyllid, Diaphorina citri
Source: MDPI journal article supplement (doi:10.3390/ijms23179654), 2022-08-25
Supplement: s1 [file s1]

Table S1. Primers used in this study

| Primers       | Sequences                                                | Purpose             |
|---------------|----------------------------------------------------------|---------------------|
| <i>DcGSK3</i> | F: ATGCAAATTATGAGACGGCT<br>R: CTAAGCCATGTCATTGGCTC       | ORF amplify         |
| <i>DcGSK3</i> | F: CCCCTCTGTTCAACTTCACCG<br>R: CGTGGTTTCCGAGAGGTCTGTAG   |                     |
| <i>GAPDH</i>  | F: CATGGCAAGTTCAACGGTGA<br>R: CGATGCCTTCTCAATGGTGG       |                     |
| <i>TPS1</i>   | F: GACATTTTCCGACTTTTCCCC<br>R: TTGCGGTCTACACGACAGCC      |                     |
| <i>Tre1-1</i> | F: AAATCATCACCAAGGACAATCAA<br>R: GAAGAGCCACTTTTCAGCCAG   | RT-qPCR<br>analysis |
| <i>Tre1-2</i> | F: AAGCCAATGCTGGGAATCG<br>R: GGTCTGTGAAATCAGGGGGG        |                     |
| <i>Tre2</i>   | F: CAAGGAATGGTTGGAGGCTGT<br>R: GCGGAGATAGGTTACTGGGGT     |                     |
| <i>HK</i>     | F: GACTTTCTGGCGGCGTGTATC<br>R: TGGTTGTCTTGTCTGTGTGA      |                     |
| <i>G6PI</i>   | F: TGCTGTGGGACCAAGAGTTCAT<br>R: ACTTTGCCCCGATTTGTAGATAG  |                     |
| <i>GFAT</i>   | F: TGAGCATTACAGACTCCGCA<br>R: GCGGATTTGCGGAATGTAGTC      |                     |
| <i>GNPNA</i>  | F: CGATTATGACCACGGGTTCTT<br>R: ACTTCACCAGAACGGCAATCA     |                     |
| <i>PAGM</i>   | F: GACAACTCAGGGGAACTCAACT<br>R: GCAATACGGTCTCCATCCAACA   |                     |
| <i>UAP</i>    | F: AAGCCTGATGCTGTAGGAAATG<br>R: GCACAAGGAATGAATGACCAAT   |                     |
| <i>CHT</i>    | F: CGTGTATGCCTTTGCCGAT<br>R: TCCTTGAGTCTGACCAACCACC      |                     |
| <i>NAG</i>    | F: GTGGGAGTGGATGTGTTCCG<br>R: GCTTCAACTTGGACCAGAATAAAA   |                     |
| <i>ACC</i>    | F: CCTTCCCGTGTCCACTCCTTA<br>R: TACGAAGTTGAGGACCTGAGCA    |                     |
| <i>FAS</i>    | F: GAAGGTTATCCCCTCTCCAAG<br>R: CAGGAGGTTGTTGGTGTGGTATT   |                     |
| <i>MCAD</i>   | F: CTGTTCAAGGTGTTTGGAGGCA<br>R: GGGTTACTTTGGTATGTTGGGG   |                     |
| <i>GCD</i>    | F: GGACCAGATGCTCCTTCTTGCTA<br>R: AGTTGTGGGATTTGGTTGGC    |                     |
| <i>ACAT</i>   | F: CAGAAGGGAGTTGCCTCTATTTG<br>R: CGATAAACCAAAAGTGTCTCTCC |                     |
| <i>Lipase</i> | F: CCCAACAGGATTCCGTGACTAA<br>R: GAACGGTCACATTACCAATAGGG  |                     |

---

|                 |                                                                                                                       |           |
|-----------------|-----------------------------------------------------------------------------------------------------------------------|-----------|
| <i>FAB</i>      | F: TCTGATTACTCGCAAGGTGGG<br>R: ACGCTCTTCACCTTACGACCG                                                                  |           |
| <i>FAR2</i>     | F: ACGCTCTTCACCTTACGACCG<br>R: AATAGGACGAACACGGCAACC                                                                  |           |
| <i>FAR1</i>     | F: GAACGCTTCCATAAAGACCCA<br>R: TTGACTCCTTCTTTTAGGGATTG                                                                |           |
| <i>ELOVL7</i>   | F: CAGTCGTCAAAGTGGTTTTAGAGC<br>R: AGGGCAGTGATTGATTGTTCTT                                                              |           |
| <i>ELOVL6</i>   | F: CTCTGAGGAAGGCTTTGATTGTC<br>R: AGGCATACCAGGTGTAGAGGAGC                                                              |           |
| <i>FA2H</i>     | F: TACATTGGGTATGGACGGGTTAG<br>R: GAGGAGAGTTGTCTGGAGGCTT                                                               |           |
| <i>Lipase 3</i> | F: TACATTGGGTATGGACGGGTTAG<br>R: AGGAGAGTTGTCTGGAGGCTTC                                                               |           |
| <i>ELOVL1</i>   | F: TCCGCCTATTTACCGCCCT<br>R: GGTCCCGCATACAACACGAT                                                                     |           |
| <i>Lipase 1</i> | F: AGGCTATGATGTTTGGTTGTGG<br>R: TGTCGTAGACTCCCATTTCGTG                                                                |           |
| <i>LCFATP4</i>  | F: GAAGATGCTGGGTTTGAAGTGC<br>R: ACAAAGATTCCGACAGGGTGGT                                                                |           |
| <i>ALDH</i>     | F: CTCATCATCGGTGCTTGGAAC<br>R: ACAGAGGTAGAGCCCGTGTAGAA                                                                |           |
| <i>FAAH</i>     | F: CCACGGATGATGCTGAAACTG<br>R: ATCGGATGCCACTCCTACAATG                                                                 |           |
| <i>ELOVL4</i>   | F: CAGTTCGCAATCATCCTATCCT<br>R: GTAGAAGTTGGCAAAGAGCAGTG                                                               |           |
| <i>LCFA4</i>    | F: CCCC GTGGTGAGATTCTGATT<br>R: ACCATCGCTTTCCTTCTTCGT                                                                 |           |
| <i>LCFA6</i>    | F: GGAAAGGAGCCAAAGAATCAAA<br>R: CCAAGCCCAACAGACCAGAT                                                                  |           |
| <i>dsDcGSK3</i> | F: <u>GGATCCTAATACGACTCACTATAGG</u> ATCATCAAAGTCCTCGGCA<br>R: <u>GGATCCTAATACGACTCACTATAGG</u> GTTGAGATTCGGCTGGATG    | dsRNA     |
| <i>dsGFP</i>    | F: <u>GGATCCTAATACGACTCACTATAGG</u> CAGTGCTTCAGCCGCTACCC<br>R: <u>GGATCCTAATACGACTCACTATAGG</u> ACTCCAGCAGGACCATGTGAT | synthesis |

---

The underline indicates T7 promoter sequence.
